# Supplementary material for: Marine Predators Algorithm for Optimizing GENCO Surplus in Power Markets: A Metaheuristic-Based Approach
Source: Research Square preprint supplement (doi:10.21203/rs.3.rs-7743320/v1), 2025-10-17
Supplement: Supplementary file 1 [file 2009ee68efd92e7f0a59b70e.docx]

APPENDIX

TA BLE A 1 Hourly bidding behavior of five GENCOs

Min of offered volume Parameter of GC-2 to GC-6

! Hour # (in MWh)

Max of offered volume of GC-2 to

GC-6 (in MWh)

Min of offered price of GC-2 Mean of offered Price of GC-2 to GC-6 Max of offered Price of GC-2

to GC-6 (in $/MWh) (in $/MWh) to GC-6 (in $/MWh)

| 1 | [0,0,0,0,0] | [0,0,0,0,0] | [4,3,5,4,4] | [3,7,6,4,5] | [2,4,5,7,9] [6,9,10,11,12] | [2.5,4.5,5.5,7.5,9.5] | [7,9,10.5,11.5,12.5] | [3,5,6,8,10] [8,9,11, 12,13] |
| --- | --- | --- | --- | --- | --- | --- | --- | --- |
|  | [0,0,0,0,0] | [0,0,0,0,0] | [7,6,9,4,10] | [6,5,7,3,3] | [2,4,7,9,11] [2,5,8,10,12] | [2.5,5,7.5,9.5,11.5] | [3,6,8.5,10.5,12.5] | [3,6,8,10,12] [4,7,9, 11,13] |
|  | [0,0,0,0,0] |  | [4,8,7,5,6] |  | [6,9,10,12,13] | [7,9,10.5,12,13] |  | [8,9,11, 12,13] |
| 2 | [0,0,0,0,0] | [0,0,0,0,0] | [3,3,3,3,2] | [2,3,3,3,3] | [4,7,9,10,11] [4,9,11,12,13] | [5,7.5,9,10,11] | [6,9,11,12,13] | [6,8,9,10,11] [8,9,11, 12,13] |
|  | [0,0,0,0,0] | [0,0,0,0,0] | [4,4,4,5,3] | [3,3,3,3,2] | [4,6,8,9,12] [5,7,9,10,11] | [5,7,9,11,13] | [5.5,7.5,9,10,11] | [5,7,9,11,13] [6,8,9, 10,11] |
|  | [0,0,0,0,0] |  | [2,3,3,3,3] |  | [2,6,9,11,13] | [3,7,9.5,11.5,13.5] |  | [4,8,10, 12,14] |
| 3 | [0,0,0,0,0] | [0,0,0,0,0] | [4,3,5,4,4] | [3,7,6,4,5] | [2,4,5,7,9] [6,9,10,11,12] | [2.5,4.5,5.5,7.5,9.5] | [7,9,10.5,11.5,12.5] | [3,5,6,8,10] [8,9,11, 12,13] |
| [0,0,0,0,0] | | [0,0,0,0,0] | [6,6,9,4,10] | [6,6,7,3,3] | [2,4,7,9,11] [2,5,8,10,12] | [2.5,5,7.5,9.5,11.5] | [3,6,8.5,10.5,12.5] | [3,6,8,10,12] [4,7,9, 11,13] |
| [0,0,0,0,0] | |  | [4,8,7,5,6] |  | [6,9,10,12,13] | [7,9,10.5,12,13] |  | [8,9,11, 12,13] |
| 4 | [0,0,0,0,0] | [0,0,0,0,0] | [3,3,3,3,2] | [2,3,3,3,3] | [4,7,9,10,11] [4,9,11,12,13] | [5,7.5,9,10,11] | [6,9,11,12,13] | [6,8,9,10,11] [8,9,11, 12,13] |
|  | [0,0,0,0,0] | [0,0,0,0,0] | [4,4,4,5,3] | [3,3,3,3,2] | [4,6,8,9,12] [5,7,9,10,11] | [5,7,9,11,13] | [5.5,7.5,9,10,11] | [5,7,9,11,13] [6,8,9, 10,11] |
|  | [0,0,0,0,0] |  | [2,3,3,3,3] |  | [2,6,9,11,13] | [3,7,9.5,11.5,13.5] |  | [4,8,10, 12,14] |
| 5 | [0,0,0,0,0] | [0,0,0,0,0] | [5,3,5,4,4] | [3,7,6,4,5] | [2,4,5,7,9] [6,9,10,11,12] | [2.5,4.5,5.5,7.5,9.5] | [7,9,10.5,11.5,12.5] | [3,5,6,8,10] [8,9,11, 12,13] |
|  | [0,0,0,0,0] | [0,0,0,0,0] | [8,6,9,4,10] | [6,5,7,3,3] | [2,4,7,9,11] [2,5,8,10,12] | [2.5,5,7.5,9.5,11.5] | [3,6,8.5,10.5,12.5] | [3,6,8,10,12] [4,7,9, 11,13] |
|  | [0,0,0,0,0] |  | [4,8,7,5,6] |  | [6,9,10,12,13] | [7,9,10.5,12,13] |  | [8,9,11, 12,13] |
| 6 | [0,0,0,0,0] | [0,0,0,0,0] | [3,3,3,3,2] | [2,3,3,3,3] | [4,7,9,10,11] [4,9,11,12,13] | [5,7.5,9,10,11] | [6,9,11,12,13] | [6,8,9,10,11] [8,9,11, 12,13] |
|  | [0,0,0,0,0] | [0,0,0,0,0] | [4,4,4,5,3] | [3,3,3,3,2] | [4,6,8,9,12] [5,7,9,10,11] | [5,7,9,11,13] | [5.5,7.5,9,10,11] | [5,7,9,11,13] [6,8,9, 10,11] |
|  | [0,0,0,0,0] |  | [2,3,3,3,3] |  | [2,6,9,11,13] | [3,7,9.5,11.5,13.5] |  | [4,8,10, 12,14] |
| 7 | [0,0,0,0,0] | [0,0,0,0,0] | [4,3,5,5,4] | [3,7,6,4,5] | [2,4,5,7,9] [6,9,10,11,12] | [2.5,4.5,5.5,7.5,9.5] | [7,9,10.5,11.5,12.5] | [3,5,6,8,10] [8,9,11, 12,13] |
|  | [0,0,0,0,0] | [0,0,0,0,0] | [7,6,9,4,10] | [6,5,7,3,3] | [2,4,7,9,11] [2,5,8,10,12] | [2.5,5,7.5,9.5,11.5] | [3,6,8.5,10.5,12.5] | [3,6,8,10,12] [4,7,9, 11,13] |
|  | [0,0,0,0,0] |  | [4,8,7,5,6] |  | [6,9,10,12,13] | [7,9,10.5,12,13] |  | [8,9,11, 12,13] |
| 8 | [0,0,0,0,0] | [0,0,0,0,0] | [3,3,3,3,2] | [2,3,3,3,3] | [4,7,9,10,11] [4,9,11,12,13] | [5,7.5,9,10,11] | [6,9,11,12,13] | [6,8,9,10,11] [8,9,11, 12,13] |
|  | [0,0,0,0,0] | [0,0,0,0,0] | [4,4,4,5,3] | [3,3,3,3,2] | [4,6,8,9,12] [5,7,9,10,11] | [5,7,9,11,13] | [5.5,7.5,9,10,11] | [5,7,9,11,13] [6,8,9, 10,11] |
|  | [0,0,0,0,0] |  | [2,3,3,3,3] |  | [2,6,9,11,13] | [3,7,9.5,11.5,13.5] |  | [4,8,10, 12,14] |
| 9 | [0,0,0,0,0] | [0,0,0,0,0] | [4,3,5,4,4] | [3,7,6,4,5] | [2,4,5,7,9] [6,9,10,11,12] | [2.5,4.5,5.5,7.5,9.5] | [7,9,10.5,11.5,12.5] | [3,5,6,8,10] [8,9,11, 12,13] |
|  | [0,0,0,0,0] | [0,0,0,0,0] | [7,6,9,4,10] | [6,5,7,3,3] | [2,4,7,9,11] [2,5,8,10,12] | [2.5,5,7.5,9.5,11.5] | [3,6,8.5,10.5,12.5] | [3,6,8,10,12] [4,7,9, 11,13] |
|  | [0,0,0,0,0] |  | [4,8,7,5,5] |  | [6,9,10,12,13] | [7,9,10.5,12,13] |  | [8,9,11, 12,13] |
| 10 | [0,0,0,0,0] | [0,0,0,0,0] | [3,3,3,3,2] | [2,3,3,3,3] | [4,7,9,10,11] [4,9,11,12,13] | [5,7.5,9,10,11] | [6,9,11,12,13] | [6,8,9,10,11] [8,9,11, 12,13] |
|  | [0,0,0,0,0] | [0,0,0,0,0] | [4,4,4,5,3] | [3,3,3,3,2] | [4,6,8,9,12] [5,7,9,10,11] | [5,7,9,11,13] | [5.5,7.5,9,10,11] | [5,7,9,11,13] [6,8,9, 10,11] |
|  | [0,0,0,0,0] |  | [2,3,3,3,3] |  | [2,6,9,11,13] | [3,7,9.5,11.5,13.5] |  | [4,8,10, 12,14] |
| 11 | [0,0,0,0,0] | [0,0,0,0,0] | [4,3,5,4,4] | [3,7,6,4,5] | [2,4,5,7,9] [6,9,10,11,12] | [2.5,4.5,5.5,7.5,9.5] | [7,9,10.5,11.5,12.5] | [3,5,6,8,10] [8,9,11, 12,13] |
|  | [0,0,0,0,0] | [0,0,0,0,0] | [7,6,9,4,10] | [6,5,7,3,3] | [2,4,7,9,11] [2,5,8,10,12] | [2.5,5,7.5,9.5,11.5] | [3,6,8.5,10.5,12.5] | [3,6,8,10,12] [4,7,9, 11,13] |
|  | [0,0,0,0,0] |  | [4,8,7,5,6] |  | [6,9,10,12,13] | [7,9,10.5,12,13] |  | [8,9,11, 12,13] |
| 12 | [0,0,0,0,0] | [0,0,0,0,0] | [3,3,3,3,2] | [2,3,3,3,3] | [4,7,9,10,11] [4,9,11,12,13] | [5,7.5,9,10,11] | [6,9,11,12,13] | [6,8,9,10,11] [8,9,11, 12,13] |
|  | [0,0,0,0,0] | [0,0,0,0,0] | [4,4,4,5,3] | [3,3,3,3,2] | [4,6,8,9,12] [5,7,9,10,11] | [5,7,9,11,13] | [5.5,7.5,9,10,11] | [5,7,9,11,13] [6,8,9, 10,11] |
|  | [0,0,0,0,0] |  | [2,3,3,3,3] |  | [2,6,9,11,13] | [3,7,9.5,11.5,13.5] |  | [4,8,10, 12,14] |

| TA BLE A 1 | (Continued) | |  | | | | | |
| --- | --- | --- | --- | --- | --- | --- | --- | --- |
|  | Min of offered volume | | Max of offered | |  |  | |  |
| Parameter | of GC-2 to GC-6 | | volume of GC-2 to | | Min of offered price of GC-2 | Mean of offered Price of GC-2 to GC-6 | | Max of offered Price of GC-2 |
| ! Hour # | (in MWh) | | GC-6 (in MWh) | | to GC-6 (in $/MWh) | (in $/MWh) | | to GC-6 (in $/MWh) |
| 13 | [0,0,0,0,0] | [0,0,0,0,0] | [4,3,5,4,4] | [3,7,6,4,5] | [2,4,5,7,9] [6,9,10,11,12] | [2.5,4.5,5.5,7.5,9.5] | [7,9,10.5,11.5,12.5] | [3,5,6,8,10] [8,9,11, 12,13] |
|  | [0,0,0,0,0] | [0,0,0,0,0] | [7,6,9,4,11] | [6,5,7,3,3] | [2,4,7,9,11] [2,5,8,10,12] | [2.5,5,7.5,9.5,11.5] | [3,6,8.5,10.5,12.5] | [3,6,8,10,12] [4,7,9, 11,13] |
|  | [0,0,0,0,0] |  | [4,8,7,5,6] |  | [6,9,10,12,13] | [7,9,10.5,12,13] |  | [8,9,11, 12,13] |
| 14 | [0,0,0,0,0] | [0,0,0,0,0] | [3,3,3,3,2] | [2,3,3,3,3] | [4,7,9,10,11] [4,9,11,12,13] | [5,7.5,9,10,11] | [6,9,11,12,13] | [6,8,9,10,11] [8,9,11, 12,13] |
|  | [0,0,0,0,0] | [0,0,0,0,0] | [4,4,4,5,3] | [3,3,3,3,2] | [4,6,8,9,12] [5,7,9,10,11] | [5,7,9,11,13] | [5.5,7.5,9,10,11] | [5,7,9,11,13] [6,8,9, 10,11] |
|  | [0,0,0,0,0] |  | [2,3,3,3,3] |  | [2,6,9,11,13] | [3,7,9.5,11.5,13.5] |  | [4,8,10, 12,14] |
| 15 | [0,0,0,0,0] | [0,0,0,0,0] | [4,3,5,4,4] | [3,7,6,4,5] | [2,4,5,7,9] [6,9,10,11,12] | [2.5,4.5,5.5,7.5,9.5] | [7,9,10.5,11.5,12.5] | [3,5,6,8,10] [8,9,11, 12,13] |
|  | [0,0,0,0,0] | [0,0,0,0,0] | [7,6,9,4,10] | [6,5,7,3,3] | [2,4,7,9,11] [2,5,8,10,12] | [2.5,5,7.5,9.5,11.5] | [3,6,8.5,10.5,12.5] | [3,6,8,10,12] [4,7,9, 11,13] |
|  | [0,0,0,0,0] |  | [4,8,7,5,6] |  | [6,9,10,12,13] | [7,9,10.5,12,13] |  | [8,9,11, 12,13] |
| 16 | [0,0,0,0,0] | [0,0,0,0,0] | [3,3,3,3,2] | [2,3,3,3,3] | [4,7,9,10,11] [4,9,11,12,13] | [5,7.5,9,10,11] | [6,9,11,12,13] | [6,8,9,10,11] [8,9,11, 12,13] |
|  | [0,0,0,0,0] | [0,0,0,0,0] | [4,4,4,5,3] | [3,3,3,3,2] | [4,6,8,9,12] [5,7,9,10,11] | [5,7,9,11,13] | [5.5,7.5,9,10,11] | [5,7,9,11,13] [6,8,9, 10,11] |
|  | [0,0,0,0,0] |  | [2,3,3,3,3] |  | [2,6,9,11,13] | [3,7,9.5,11.5,13.5] |  | [4,8,10, 12,14] |
| 17 | [0,0,0,0,0] | [0,0,0,0,0] | [4,3,5,4,4] | [3,7,6,4,5] | [2,4,5,7,9] [6,9,10,11,12] | [2.5,4.5,5.5,7.5,9.5] | [7,9,10.5,11.5,12.5] | [3,5,6,8,10] [8,9,11, 12,13] |
|  | [0,0,0,0,0] | [0,0,0,0,0] | [7,6,9,4,10] | [6,5,7,3,3] | [2,4,7,9,11] [2,5,8,10,12] | [2.5,5,7.5,9.5,11.5] | [3,6,8.5,10.5,12.5] | [3,6,8,10,12] [4,7,9, 11,13] |
|  | [0,0,0,0,0] |  | [4,8,7,5,6] |  | [6,9,10,12,13] | [7,9,10.5,12,13] |  | [8,9,11, 12,13] |
| 18 | [0,0,0,0,0] | [0,0,0,0,0] | [3,3,3,3,2] | [2,3,3,3,3] | [4,7,9,10,11] [4,9,11,12,13] | [5,7.5,9,10,11] | [6,9,11,12,13] | [6,8,9,10,11] [8,9,11, 12,13] |
|  | [0,0,0,0,0] | [0,0,0,0,0] | [4,4,4,5,3] | [3,3,3,3,2] | [4,6,8,9,12] [5,7,9,10,11] | [5,7,9,11,13] | [5.5,7.5,9,10,11] | [5,7,9,11,13] [6,8,9, 10,11] |
|  | [0,0,0,0,0] |  | [2,3,3,3,3] |  | [2,6,9,11,13] | [3,7,9.5,11.5,13.5] |  | [4,8,10, 12,14] |
| 19 | [0,0,0,0,0] | [0,0,0,0,0] | [4,3,5,4,4] | [3,7,6,4,5] | [2,4,5,7,9][6,9,10,11,12] | [2.5,4.5,5.5,7.5,9.5] | [7,9,10.5,11.5,12.5] | [3,5,6,8,10] [8,9,11, 12,13] |
|  | [0,0,0,0,0] | [0,0,0,0,0] | [7,6,9,4,10] | [6,5,7,3,3] | [2,4,7,9,11] [2,5,8,10,12] | [2.5,5,7.5,9.5,11.5] | [3,6,8.5,10.5,12.5] | [3,6,8,10,12] [4,7,9, 11,13] |
|  | [0,0,0,0,0] |  | [4,8,7,5,6] |  | [6,9,10,12,13] | [7,9,10.5,12,13] |  | [8,9,11, 12,13] |
| 20 | [0,0,0,0,0] | [0,0,0,0,0] | [3,3,3,3,2] | [2,3,3,3,3] | [4,7,9,10,11] [4,9,11,12,13] | [5,7.5,9,10,11] | [6,9,11,12,13] | [6,8,9,10,11] [8,9,11, 12,13] |
|  | [0,0,0,0,0] | [0,0,0,0,0] | [4,4,4,5,3] | [3,3,3,3,2] | [4,6,8,9,12] [5,7,9,10,11] | [5,7,9,11,13] | [5.5,7.5,9,10,11] | [5,7,9,11,13] [6,8,9, 10,11] |
|  | [0,0,0,0,0] |  | [2,3,3,3,3] |  | [2,6,9,11,13] | [3,7,9.5,11.5,13.5] |  | [4,8,10, 12,14] |
| 21 | [0,0,0,0,0] | [0,0,0,0,0] | [4,3,5,4,4] | [3,7,6,4,5] | [2,4,5,7,9] [6,9,10,11,12] | [2.5,4.5,5.5,7.5,9.5] | [7,9,10.5,11.5,12.5] | [3,5,6,8,10] [8,9,11, 12,13] |
|  | [0,0,0,0,0] | [0,0,0,0,0] | [7,6,9,4,10] | [6,5,7,3,3] | [2,4,7,9,11] [2,5,8,10,12] | [2.5,5,7.5,9.5,11.5] | [3,6,8.5,10.5,12.5] | [3,6,8,10,12] [4,7,9, 11,13] |
|  | [0,0,0,0,0] |  | [4,8,7,5,6] |  | [6,9,10,12,13] | [7,9,10.5,12,13] |  | [8,9,11, 12,13] |
| 22 | [0,0,0,0,0] | [0,0,0,0,0] | [3,3,3,3,2] | [2,3,3,3,3] | [4,7,9,10,11] [4,9,11,12,13] | [5,7.5,9,10,11] | [6,9,11,12,13] | [6,8,9,10,11] [8,9,11, 12,13] |
|  | [0,0,0,0,0] | [0,0,0,0,0] | [4,4,4,5,3] | [3,3,3,3,2] | [4,6,8,9,12] [5,7,9,10,11] | [5,7,9,11,13] | [5.5,7.5,9,10,11] | [5,7,9,11,13] [6,8,9, 10,11] |
|  | [0,0,0,0,0] |  | [2,3,3,3,3] |  | [2,6,9,11,13] | [3,7,9.5,11.5,13.5] |  | [4,8,10, 12,14] |
| 23 | [0,0,0,0,0] | [0,0,0,0,0] | [4,3,5,4,4] | [3,7,6,4,5] | [2,4,5,7,9] [6,9,10,11,12] | [2.5,4.5,5.5,7.5,9.5] | [7,9,10.5,11.5,12.5] | [3,5,6,8,10] [8,9,11, 12,13] |
|  | [0,0,0,0,0] | [0,0,0,0,0] | [7,6,9,4,10] | [6,5,7,3,3] | [2,4,7,9,11] [2,5,8,10,12] | [2.5,5,7.5,9.5,11.5] | [3,6,8.5,10.5,12.5] | [3,6,8,10,12] [4,7,9, 11,13] |
|  | [0,0,0,0,0] |  | [4,8,7,5,6] |  | [6,9,10,12,13] | [7,9,10.5,12,13] |  | [8,9,11, 12,13] |
| 24 | [0,0,0,0,0] | [0,0,0,0,0] | [3,3,3,3,2] | [2,3,3,3,3] | 4,7,9,10,11] [4,9,11,12,13] | [5,7.5,9,10,11] | [6,9,11,12,13] | [6,8,9,10,11] [8,9,11, 12,13] |
|  | [0,0,0,0,0] | [0,0,0,0,0] | [4,4,4,5,3] | [3,3,3,3,2] | [4,6,8,9,12] [5,7,9,10,11] | [5, 7, 9, 11, 13] | [5.5,7.5,9,10,11] | [5,7,9,11,13] [6,8,9, 10,11] |
|  | [0,0,0,0,0] |  | [2,3,3,3,3] |  | [2,6,9,11,13] | [3,7,9.5,11.5,13.5] |  | [4,8,10, 12,14] |

TABLE A 2 Lower and upper limits of hourly offers for GC-1

| Parameter | GC-1 minimum offer | GC-1 maximum offer | GC-1 offer minimum | GC-1 maximum offer |
| --- | --- | --- | --- | --- |
| Hour #! | volume (MWh) | volume (MWh) | price ($/MWh) | price ($/MWh) |
| 1 | [0,0,0,0,0] | [8,5,8,8,15] | [1, 3, 4, 6, 8] | [3,5,6, 8,10] |
| 2 | [0,0,0,0,0] | [4,4,4,5,3] | [1, 3, 5, 7, 9] | [3,5,7, 9,11] |
| 3 | [0,0,0,0,0] | [7,5,8,8,15] | [1, 3, 4, 6, 8] | [3,5,6, 8,10] |
| 4 | [0,0,0,0,0] | [3,4,4,5,3] | [1, 3, 5, 7, 9] | [3,5,7, 9,11] |
| 5 | [0,0,0,0,0] | [8,5,8,8,15] | [1, 3, 4, 6, 8] | [3,5,6, 8,10] |
| 6 | [0,0,0,0,0] | [4,4,4,5,3] | [1, 3, 5, 7, 9] | [3,5,7, 9,11] |
| 7 | [0,0,0,0,0] | [8,6,8,8,15] | [1, 3, 4, 6, 8] | [3,5,6, 8,10] |
| 8 | [0,0,0,0,0] | [4,4,4,5,3] | [1, 3, 5, 7, 9] | [3,5,7, 9,11] |
| 9 | [0,0,0,0,0] | [8,5,8,7,15] | [1, 3, 4, 6, 8] | [3,5,6, 8,10] |
| 10 | [0,0,0,0,0] | [4,4,4,5,3] | [1, 3, 5, 7, 9] | [3,5,7, 9,11] |
| 11 | [0,0,0,0,0] | [8,5,8,8,15] | [1, 3, 4, 6, 8] | [3,5,6, 8,10] |
| 12 | [0,0,0,0,0] | [4,4,4,5,3] | [1, 3, 5, 7, 9] | [3,5,7, 9,11] |
| 13 | [0,0,0,0,0] | [8,5,8,8,13] | [1, 3, 4, 6, 8] | [3,5,6, 8,10] |
| 14 | [0,0,0,0,0] | [4,4,4,5,3] | [1, 3, 5, 7, 9] | [3,5,7, 9,11] |
| 15 | [0,0,0,0,0] | [8,5,8,8,15] | [1, 3, 4, 6, 8] | [3,5,6, 8,10] |
| 16 | [0,0,0,0,0] | [4,4,4,5,3] | [1, 3, 5, 7, 9] | [3,5,7, 9,11] |
| 17 | [0,0,0,0,0] | [7,5,8,8,15] | [1, 3, 4, 6, 8] | [3,5,6, 8,10] |
| 18 | [0,0,0,0,0] | [5,4,4,5,3] | [1, 3, 5, 7, 9] | [3,5,7, 9,11] |
| 19 | [0,0,0,0,0] | [8,5,8,8,15] | [1, 3, 4, 6, 8] | [3,5,6, 8,10] |
| 20 | [0,0,0,0,0] | [4,4,4,5,3] | [1, 3, 5, 7, 9] | [3,5,7, 9,11] |
| 21 | [0,0,0,0,0] | [8,5,8,8,15] | [1, 3, 4, 6, 8] | [3,5,6, 8,10] |
| 22 | [0,0,0,0,0] | [4,4,4,5,3] | [1, 3, 5, 7, 9] | [3,5,7, 9,11] |
| 23 | [0,0,0,0,0] | [8,5,8,8,14] | [1, 3, 4, 6, 8] | [3,5,6, 8,10] |
| 24 | [0,0,0,0,0] | [4,4,4,5,3] | [1, 3, 5, 7, 9] | [3,5,7, 9,11] |

TABLE A 3 Carbon credit limit and emission factor of six GENCOs

| Parameter # GCs ! | GC-1 | GC-2 | GC-3 | GC-4 | GC-5 | GC-6 |
| --- | --- | --- | --- | --- | --- | --- |
| Carbon Credit Limit (in tons of CO2E) | 180 | 144 | 240 | 180 | 144 | 240 |
| Emission Coefficient (in tons of CO2E per MWh) | 1.25 | 0.8 | 0.25 | 1.25 | 0.8 | 0.25 |
